# Supplementary material for: Pharmacogenomic Studies of Antiviral Drug Favipiravir
Source: MDPI journal article supplement (doi:10.3390/pharmaceutics16040503), 2024-04-07
Supplement: s1 [file s1]

## Supplementary Materials

**Table S1.** Electrochemical FAV detection based on electro oxidation.

| Method                                       | Type of electrode<br>(Modification)                                                        | Linear range,<br>$\mu\text{M}$                                                  | Limit of<br>detection, $\mu\text{M}$ | Reference |
|----------------------------------------------|--------------------------------------------------------------------------------------------|---------------------------------------------------------------------------------|--------------------------------------|-----------|
| SWV                                          | BDDE                                                                                       | 0.064–130                                                                       | 0.018                                | [49]      |
| SWV                                          | MnO <sub>2</sub> -rGO/SPE                                                                  | 0.01–55                                                                         | 0.009                                | [50]      |
| DPV                                          | GCE<br>(bimetallic)<br><br>gold/silver core–<br>shell<br>nanoparticles<br>(Au@Ag<br>CSNPs) | 0.005–2.0                                                                       | 0.0046                               | [48]      |
| DPV                                          | Pencil graphite<br>electrode<br><br>PGE                                                    | 5.0–200.0 (1st<br>linear segment)<br><br>200.0–600.0<br>(2nd linear<br>segment) | 1.55 (oxidation)                     | [51]      |
| DPV                                          | Diamond<br>NPs/CPE                                                                         | 0.2-1.0                                                                         | $4.83 \times 10^{-3}$                | [64]      |
| AdsSWV                                       | GCE                                                                                        | 6.4–640                                                                         | 1.7                                  | [65]      |
| Electrochemical<br>impedance<br>spectroscopy | Fe <sub>3</sub> O <sub>4</sub> @SiO <sub>2</sub> –<br>Au/GCE                               | 0.1–104 ng/mL                                                                   | 4.78 pg/mL                           | [66]      |

|                                     |                                                                                                        |                                |                    |           |
|-------------------------------------|--------------------------------------------------------------------------------------------------------|--------------------------------|--------------------|-----------|
| The CV and<br>AdS-SWV<br>techniques | Carbon black<br>(Au@CCB)<br>modified<br>graphite<br>nanopowder<br>flakes paste<br>electrode<br>(GNFPE) | 0.03 – 77.3                    | 8.1 nM             | [63]      |
| SWV                                 |                                                                                                        |                                |                    | [67]      |
|                                     | (Pt@rGO/ GCE                                                                                           | 3.16 to 100.0<br>$\mu\text{M}$ | 2.46 $\mu\text{M}$ |           |
| DPV                                 | SPE                                                                                                    | 50 - 500                       | 37 $\mu\text{M}$   | This work |

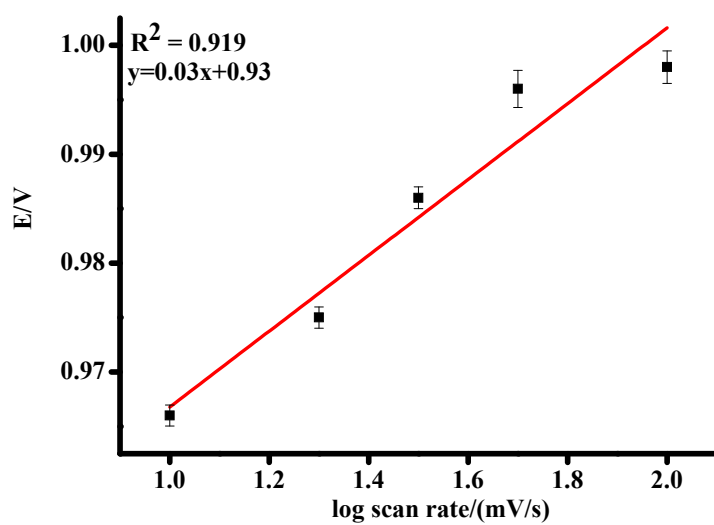

**Figure S1.** The relationship between  $E_{pa}$  vs.  $\ln v$  at the surface of on SPE/CNT.

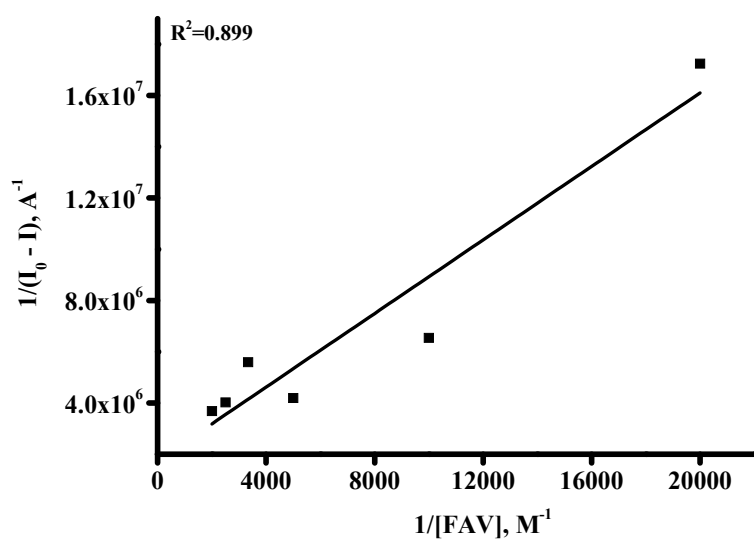

(a)

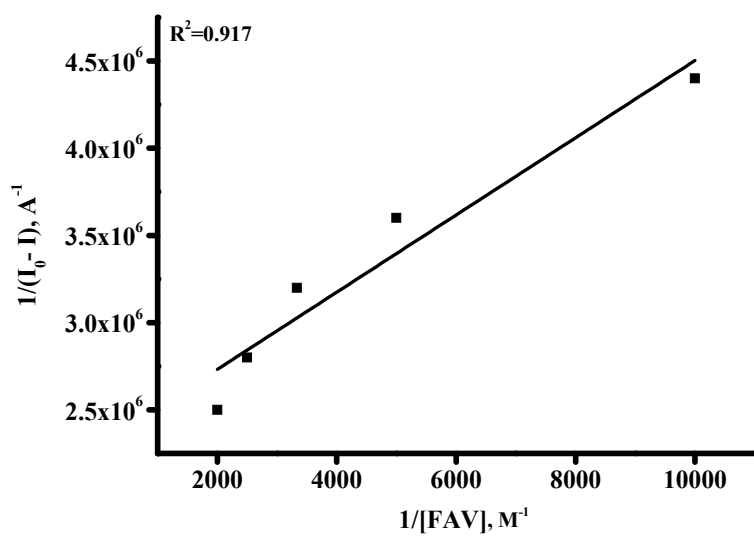

(b)

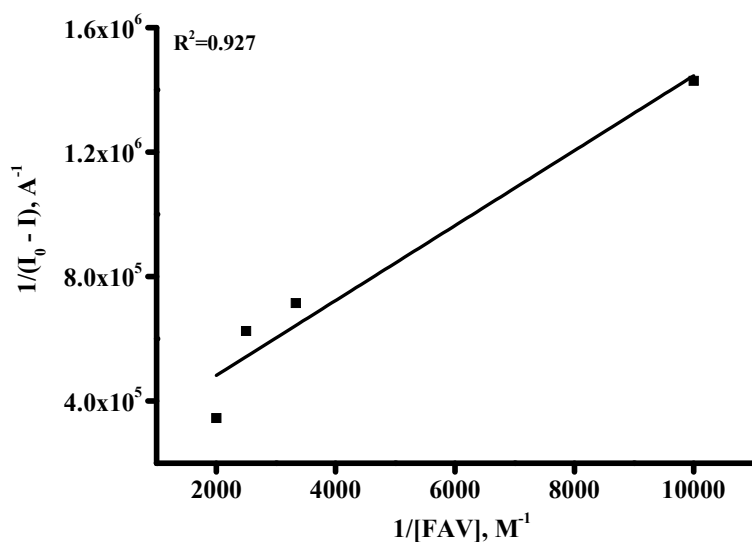

(c)

**Figure S2.** Linear plots for  $1/(I_0 - I)$  depending on  $1/[drug]$ : **(a)** FAV/dsDNA (for guanine signals); equation for linear fit:  $y=718x+1.75 \times 10^6$ ,  $R^2=0.899$ ,  $K_b=0.24 \times 10^4 M^{-1}$ ; **(b)** FAV/dsDNA (for adenine signals); equation for linear fit:  $y=221x+2.29$ ,  $R^2=0.917$ ,  $K_b=1.03 \times 10^4 M^{-1}$ ; **(c)** FAV/dsDNA (for thymine signals); equation for linear fit:  $y=120.45x+241154$ ,  $R^2=0.927$ ,  $K_b=0.20 \times 10^4 M^{-1}$ .
